# Supplementary material for: Target-driven selection in a dynamic nitrone library
Source: Royal Society of Chemistry journal article supplement (doi:10.1039/b805945d), 2008-01-01
Supplement: b805945d.pdf [file b805945d.pdf]

# Target-driven selection in a dynamic nitron library

**Simon M. Turega, Christiane Lorenz,  
Jan W. Sadownik and Douglas Philp\***

*EaStCHEM and Centre for Biomolecular Sciences, School of Chemistry,  
University of St Andrews, St Andrews, Fife KY16 9ST, United Kingdom. Fax:  
+44 1334 463808; Tel: +44 1334 467264; E-mail: d.philp@st-andrews.ac.uk*

## **SUPPORTING INFORMATION**

## Spectroscopic Data:

### Compound 1:

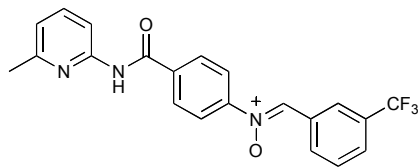

M.p. = 186.0-187.6 °C;  $^1\text{H}$  NMR (300.1 MHz,  $\text{CD}_2\text{Cl}_2$ )  $\delta_{\text{H}}$  = 8.86 (1H, s, Ar CH), 8.65 (1H, s, NH), 8.58 (1H, d,  $J_{\text{H,H}}$  8, Ar CH), 8.18 (1H, d,  $J_{\text{H,H}}$  8, Ar CH), 8.14 (1H, s, N=CH), 8.11 (2H, d,  $J_{\text{H,H}}$  9, Ar CH), 7.97 (2H, d,  $J_{\text{H,H}}$  9, Ar CH), 7.79 (1H, d,  $J_{\text{H,H}}$  8, Ar CH), 7.74-7.66 (2H, m, Ar CH), 7.02 (1H, d,  $J_{\text{H,H}}$  7, Ar CH), 2.50 (3H, s,  $\text{CH}_3$ );  $^{13}\text{C}$  NMR (75.5 MHz  $\text{CD}_2\text{Cl}_2$ )  $\delta_{\text{C}}$  = 164.4 (q), 157.7 (q), 151.5 (q), 151.0 (q), 139.0 (Ar CH), 136.5 (q), 133.5 (N=CH), 132.3 (Ar CH), 131.7 (q), 131.2 (C, q,  $^3J_{\text{C,F}}$  32, quart.), 129 (Ar CH), 128.8 (2C, Ar CH), 127.6 (C, q,  $^3J_{\text{C,F}}$  3, Ar CH), 125.6 (C, q,  $^3J_{\text{C,F}}$  4, Ar CH), 122.5 (2C, Ar CH), 120.0 (Ar CH), 111.1 (Ar CH), 24.2 ( $\text{CH}_3$ );  $^{19}\text{F}$  NMR (282.3 MHz,  $\text{CD}_2\text{Cl}_2$ ):  $\delta_{\text{F}}$  = -63.58 (3F, s,  $\text{CF}_3$ ); MS (ES-)  $m/z$  (%) = 398.0 (100) [ $\text{M}-\text{H}^+$ ]; MS (ES+)  $m/z$  (%) = 422.1 (100) [ $\text{M}+\text{Na}^+$ ]; HRMS (ES+): calcd for  $\text{C}_{21}\text{H}_{16}\text{N}_3\text{O}_2\text{F}_3\text{Na}$  (422.1): 422.1092; found 422.095; FT-IR (thin film)  $\nu_{\text{max}}/\text{cm}^{-1}$  = 3337, 1655, 1595, 1528, 1457, 1337, 1305, 1170, 1124, 1080, 690.

### Compound 2:

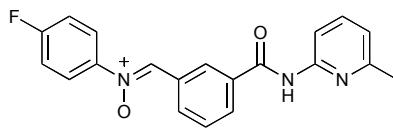

M.p. = 193-195 °C decomp.;  $^1\text{H}$  NMR (300.1 MHz,  $\text{CDCl}_3$ )  $\delta_{\text{H}}$  = 8.87 (1H, s, N=CH), 8.78 (1H, br. s, NH); 8.53 (1H, d,  $J_{\text{H,H}}$  9, Ar CH), 8.09 (1H, d,  $J_{\text{H,H}}$  9, Ar CH), 7.94 (1H, m, Ar CH), 7.92 (2H, s, Ar CH), 7.77-7.74 (2H, m, Ar CH), 7.61-7.51 (2H, m, Ar CH), 7.16-7.08 (2H, m, Ar CH), 6.88 (1H, d,  $J_{\text{H,H}}$  8, Ar CH), 2.36 (3H, s,  $\text{CH}_3$ );  $^{13}\text{C}$  NMR (75.5 MHz  $\text{CDCl}_3$ )  $\delta_{\text{C}}$  = 165.2 (q); 163.6 (C, d,  $^3J_{\text{C,F}}$  255, quart.), 157.6 (q), 151.3 (q), 145.6 (q), 138.9 (Ar CH), 135.3 (q), 133.3 (N=CH), 132.1 (Ar CH), 131.7 (q), 129.7 (Ar CH), 129.6 (Ar CH), 127.6 (Ar CH), 124.1 (2C, d,  $^3J_{\text{C,F}}$  9, Ar CH), 119.8 (Ar CH), 116.4 (2C, d,  $^3J_{\text{C,F}}$  23, Ar CH), 111.1 (Ar CH), 24.1 ( $\text{CH}_3$ );  $^{19}\text{F}$  NMR (282.3 MHz,  $\text{CD}_2\text{Cl}_2$ ):  $\delta_{\text{F}}$  = -111.53 (F, s, Ar F); MS (MS  $\text{Cl}^+$ )  $m/z$  (%) = 334.1, 350.1 (100) [ $\text{M}+\text{H}^+$ ]; HRMS ( $\text{Cl}^+$ ): calcd for  $\text{C}_{20}\text{H}_{17}\text{N}_3\text{O}_2\text{F}$  (350.1): 350.1305; found 350.1299.

### Compound 3:

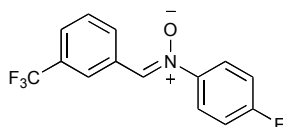

M.p. = 105.9-107.2 °C decomp.;  $^1\text{H}$  NMR (300.1 MHz,  $\text{CD}_2\text{Cl}_2$ )  $\delta_{\text{H}}$  = 8.82 (1H, s, Ar CH), 8.52 (1H, d,  $J_{\text{H,H}}$  8, Ar CH), 8.02 (1H, s, N=CH), 7.82 (2H, d,  $J_{\text{H,H}}$  9, Ar CH), 7.75 (1H, d,  $J_{\text{H,H}}$  8, Ar CH), 7.65 (1H, dd,  $J_{\text{H,H}}$  8,  $J_{\text{H,H}}$  8, Ar CH), 7.22 (2H, d,  $J_{\text{H,H}}$  9, Ar CH);  $^{13}\text{C}$  NMR (75.5 MHz  $\text{CD}_2\text{Cl}_2$ )  $\delta_{\text{C}}$  = 163.7 (C, d,  $^3J_{\text{C,F}}$  250, quart.), 145.6 (q), 133.0 (N=CH), 132.2 (Ar CH), 131.9 (q), 131.2 (C, q,  $^3J_{\text{C,F}}$  37, quart.), 129.6 (Ar CH), 127.4 (C, q,  $^3J_{\text{C,F}}$  4, quart.), 125.5 (C, q,  $^3J_{\text{C,F}}$  4, quart.), 124.1 (2C, d,  $^3J_{\text{C,F}}$  9, Ar CH), 123.3 (q), 116.4 (2C, d,  $^3J_{\text{C,F}}$  23, Ar CH);  $^{19}\text{F}$  NMR (282.3 MHz,  $\text{CD}_2\text{Cl}_2$ ):  $\delta_{\text{F}}$  = -63.53 (3F, s,  $\text{CF}_3$ ), -111.27 (F, s, Ar F) MS (Cl<sup>+</sup>)  $m/z$  (%) = 248.1 (20), 264.1 (60), 284.1 (100) [ $\text{M}+\text{H}^+$ ]; HRMS (Cl<sup>+</sup>): calcd for  $\text{C}_{14}\text{H}_{10}\text{NOF}_4$  (284.1): 284.0699; found 284.0692; FT-IR (thin film)  $\nu_{\text{max}}/\text{cm}^{-1}$  = 3117, 3039, 1599, 1553, 1499, 1435, 1332, 1124, 1074, 841, 809.

### Compound 4:

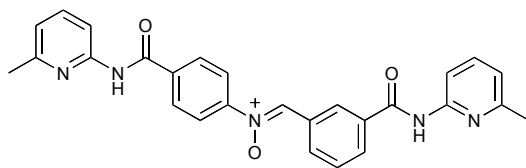

M.p. = 138.8-140.1 °C.,  $^1\text{H}$  NMR (300.1 MHz,  $\text{CD}_2\text{Cl}_2$ )  $\delta_{\text{H}}$  = 8.96 (1H, s, Ar CH), 8.79 (1H, s, NH), 8.70 (1H, s, NH), 8.54 (1H, d,  $J_{\text{H,H}}$  8, Ar CH), 8.09 (1H, d,  $J_{\text{H,H}}$  8, Ar CH), 8.08 (1H, d,  $J_{\text{H,H}}$  8, Ar CH), 8.05 (1H, s, N=CH), 8.00 (2H, d,  $J_{\text{H,H}}$  9, Ar CH), 8.00-7.96 (1H, m, Ar CH), 7.87 (2H, d,  $J_{\text{H,H}}$  9, Ar CH), 7.61 (1H, dd,  $J_{\text{H,H}}$  8,  $J_{\text{H,H}}$  8, Ar CH), 7.60 (1H, dd,  $J_{\text{H,H}}$  8,  $J_{\text{H,H}}$  8, Ar CH), 7.57 (1H, dd,  $J_{\text{H,H}}$  8,  $J_{\text{H,H}}$  8, Ar CH), 6.90 (1H, d,  $J_{\text{H,H}}$  7, Ar CH), 6.89 (1H, d,  $J_{\text{H,H}}$  7, Ar CH), 2.39 (6H, s, Ar CH);  $^{13}\text{C}$  NMR (75.5 MHz  $\text{CD}_2\text{Cl}_2$ )  $\delta_{\text{C}}$  = 165.2 (q), 164.5 (q), 157.5 (q), 151.6 (q), 151.2 (q), 151.0 (q), 139.2 (Ar CH), 139.1 (Ar CH), 136.4 (q), 135.3 (q), 134.0 (N=CH), 132.5 (Ar CH), 131.6 (2q), 130.1 (Ar CH), 129.6 (Ar CH), 128.8 (Ar CH), 127.8 (Ar CH), 122.5 (Ar CH), 120.0 (Ar CH), 119.8 (Ar CH), 111.2 (Ar CH), 111.1 (Ar CH), 24.1 ( $\text{CH}_3$ ); MS (ES<sup>+</sup>)  $m/z$  (%) = 488.18 (100) [ $\text{M}+\text{Na}^+$ ]; HRMS (ES<sup>+</sup>): calcd for  $\text{C}_{27}\text{H}_{24}\text{N}_5\text{O}_3$  (466.2): 466.1879; found 466.1888.

## CDCl<sub>3</sub> treatment

CDCl<sub>3</sub> (20 ml) was dried over CaCl<sub>2</sub> in the absence of light for 18 h. The CDCl<sub>3</sub> was then filtered through a 3 cm<sup>3</sup> plug of activated neutral type I Brockman alumina. The dried CDCl<sub>3</sub> was stored over 4 Å molecular sieves and used within 24 h of filtration.

## Nitrone exchange experiments

In a typical experiment, an NMR sample was prepared in a 5 mm NMR tube (Wilmad 527PP) by mixing appropriate volumes of stock solutions of the required nitrones (**1** and **2**), acid (either 4-bromophenylacetic acid or the diacid target **5**) and hydroxylamine **6** such that the total volume of the sample was 0.7 ml. The NMR tubes were placed in a thermostatically-controlled water bath at 298 K. Every 24 hours, the tube was transferred to an NMR spectrometer (Bruker Avance), regulated at 298 K, and 300 MHz <sup>1</sup>H NMR and 282.3 MHz <sup>19</sup>F (with <sup>1</sup>H decoupling) spectra were acquired. The ratios of **3:2** and **3:1** can be calculated readily by deconvolution of the appropriate resonances for compounds **1** and **3** which appear in the CF<sub>3</sub> region (around -63 ppm) and the appropriate resonances for compounds **2** and **3** which appear in the aryl fluoride region (between -100 and -130 ppm) of the 282.3 MHz <sup>19</sup>F NMR spectra of the exchanging mixtures of nitrones. Deconvolution was carried out using iNMR (Version 2.5, Nucleomatica, 2008) running on Mac OS X (Version 10.5.2). The ratios of **3:2** and **3:1** are not identical because of the differential rates of hydrolysis of nitrones **1** and **2**. The associated equilibrium positions for the hydrolyses of **1** and **2** are coupled to the exchange processes and so, given different hydrolytic stabilities of **1** and **2**, slight differences in the corresponding concentrations with respect to **3** would be expected. Analysis of the <sup>1</sup>H NMR spectra of the exchanging mixtures confirm the presence of differing amounts of the aldehydes derived from **1** and **2** in the exchanging mixture – with the aldehyde derived from **2** being present in a larger amount. The amount of hydrolysis is <10% of the reaction mixture.

## Determination of $K_a$ by the $^1\text{H}$ NMR dilution method

A series of  $^1\text{H}$  NMR samples were prepared in 5 mm NMR tubes (Wilmad 527PP) at concentrations of 0.8 to 100 mM in  $\text{CDCl}_3$  of equimolar amounts of the host and guest. The NMR tubes were equilibrated at 298 K using a thermostatically controlled water bath. In turn, each tube was transferred promptly to a 500 MHz NMR spectrometer (Varian UNITYplus) regulated at 298 K and a  $^1\text{H}$  NMR spectrum was acquired on each sample. Chemical shift changes of appropriate resonances in these spectra were analyzed by non-linear least squares fitting to a 1:1 binding isotherm to afford  $K_a$  values for each complex studied. For a detailed discussion of this method for  $K_a$  determination, see C. A. Wilcox in *Frontiers in Supramolecular Organic Chemistry and Photochemistry*, H. -J. Schneider and H. Dürr (Eds.), VCH, Weinheim, 1991, p.123–143.

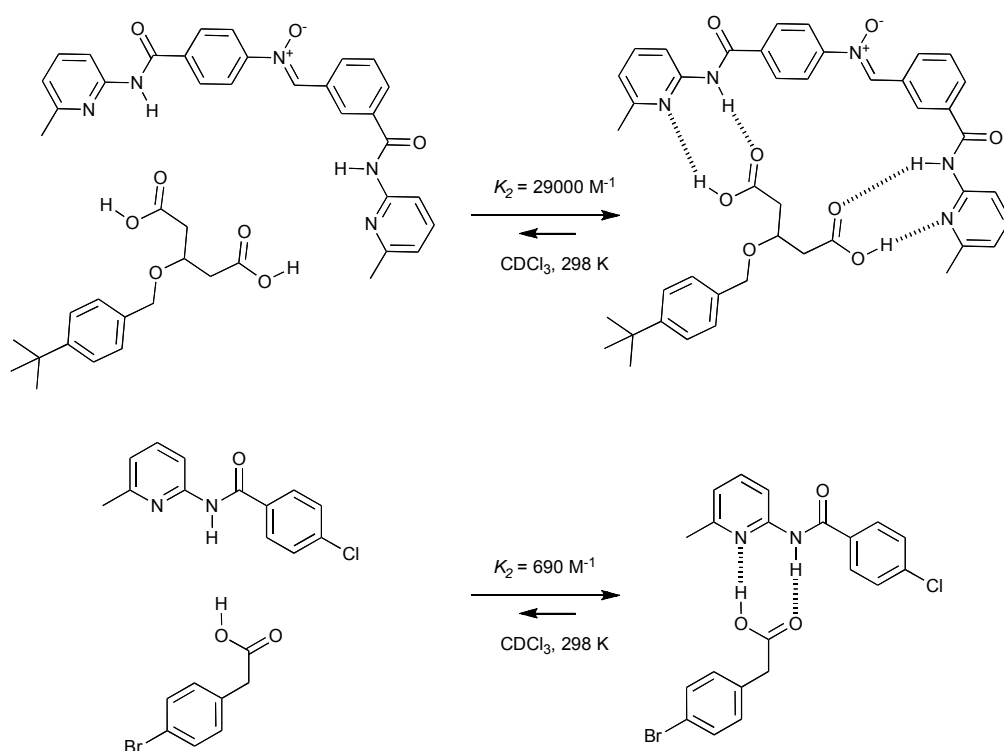

### Coordinates for unbound receptor 4

| 38 |    |        |        |        |
|----|----|--------|--------|--------|
| C  | 1  | 0.175  | 0.387  | 0.449  |
| C  | 2  | -0.705 | -1.720 | 0.784  |
| C  | 3  | -2.001 | -1.248 | 0.553  |
| C  | 4  | -2.179 | 0.104  | 0.259  |
| C  | 5  | -1.082 | 0.956  | 0.200  |
| C  | 6  | 1.574  | 2.456  | 0.215  |
| C  | 7  | 5.526  | 4.093  | 0.610  |
| C  | 8  | 4.499  | 4.823  | 0.010  |
| C  | 9  | 3.242  | 4.249  | -0.117 |
| C  | 10 | 2.987  | 2.956  | 0.364  |
| C  | 11 | 4.025  | 2.250  | 0.989  |
| C  | 12 | 5.295  | 2.813  | 1.114  |
| C  | 13 | 7.934  | 4.055  | 0.626  |
| C  | 14 | 11.961 | 5.435  | 0.846  |
| C  | 15 | 11.674 | 4.092  | 0.554  |
| C  | 16 | 10.343 | 3.674  | 0.497  |
| C  | 17 | 9.281  | 4.574  | 0.736  |
| C  | 18 | 9.594  | 5.915  | 1.050  |
| C  | 19 | 10.924 | 6.328  | 1.102  |
| C  | 20 | 12.846 | 3.194  | 0.267  |
| C  | 21 | 14.954 | -1.496 | -0.200 |
| C  | 22 | 13.648 | -1.533 | 0.297  |
| C  | 23 | 13.479 | 0.765  | 0.175  |
| C  | 24 | 14.783 | 0.909  | -0.325 |
| C  | 25 | 15.516 | -0.257 | -0.510 |
| C  | 26 | 12.975 | -2.832 | 0.668  |
| C  | 27 | -0.432 | -3.164 | 1.125  |
| H  | 28 | 2.176  | 0.518  | 0.621  |
| H  | 29 | 7.803  | 3.006  | 0.395  |
| H  | 30 | 11.728 | 1.540  | 0.799  |
| N  | 31 | 0.364  | -0.909 | 0.730  |
| N  | 32 | 1.379  | 1.114  | 0.442  |
| N  | 33 | 6.817  | 4.757  | 0.741  |
| N  | 34 | 12.609 | 1.843  | 0.407  |
| N  | 35 | 12.925 | -0.416 | 0.477  |
| O  | 36 | 0.669  | 3.226  | -0.094 |
| O  | 37 | 6.757  | 6.022  | 0.928  |
| O  | 38 | 13.932 | 3.658  | -0.062 |

### Coordinates for [4•5] complex

| 49 |    |        |        |        |
|----|----|--------|--------|--------|
| C  | 1  | 0.260  | 0.335  | 0.536  |
| C  | 2  | -0.415 | -1.876 | 0.833  |
| C  | 3  | -1.742 | -1.541 | 0.570  |
| C  | 4  | -2.055 | -0.208 | 0.294  |
| C  | 5  | -1.056 | 0.755  | 0.272  |
| C  | 6  | 1.347  | 2.572  | 0.592  |
| C  | 7  | 5.230  | 4.363  | 0.827  |
| C  | 8  | 4.145  | 4.945  | 1.485  |
| C  | 9  | 2.888  | 4.364  | 1.365  |
| C  | 10 | 2.709  | 3.202  | 0.600  |
| C  | 11 | 3.794  | 2.678  | -0.115 |
| C  | 12 | 5.053  | 3.262  | -0.013 |
| C  | 13 | 7.611  | 4.171  | 1.027  |
| C  | 14 | 11.692 | 5.172  | 1.682  |
| C  | 15 | 11.315 | 3.869  | 1.313  |
| C  | 16 | 9.966  | 3.586  | 1.104  |
| C  | 17 | 8.978  | 4.585  | 1.252  |
| C  | 18 | 9.378  | 5.887  | 1.620  |
| C  | 19 | 10.727 | 6.161  | 1.836  |
| C  | 20 | 12.432 | 2.886  | 1.117  |
| C  | 21 | 14.491 | -1.736 | 0.222  |
| C  | 22 | 13.181 | -1.836 | 0.684  |
| C  | 23 | 12.960 | 0.487  | 0.744  |
| C  | 24 | 14.278 | 0.667  | 0.284  |
| C  | 25 | 15.035 | -0.465 | 0.026  |
| C  | 26 | 12.531 | -3.175 | 0.932  |
| C  | 27 | 0.004  | -3.288 | 1.156  |
| C  | 28 | 3.975  | -1.124 | 1.528  |
| C  | 29 | 5.263  | -1.544 | 2.210  |
| C  | 30 | 6.512  | -0.871 | 1.634  |
| C  | 31 | 7.772  | -1.283 | 2.402  |
| C  | 32 | 9.059  | -0.683 | 1.864  |
| H  | 33 | 2.269  | 0.713  | 0.549  |
| H  | 34 | 7.420  | 3.121  | 0.856  |
| H  | 35 | 11.115 | 1.265  | 1.165  |
| H  | 36 | 2.084  | -1.456 | 1.478  |
| H  | 37 | 10.943 | -1.083 | 1.636  |
| N  | 38 | 0.562  | -0.947 | 0.821  |
| N  | 39 | 1.363  | 1.189  | 0.501  |
| N  | 40 | 6.543  | 4.953  | 1.053  |
| N  | 41 | 12.084 | 1.545  | 1.004  |
| N  | 42 | 12.438 | -0.738 | 0.940  |
| O  | 43 | 0.325  | 3.239  | 0.707  |
| O  | 44 | 6.552  | 6.208  | 1.317  |
| O  | 45 | 13.596 | 3.271  | 1.061  |
| O  | 46 | 2.916  | -1.803 | 1.944  |
| O  | 47 | 3.920  | -0.226 | 0.694  |
| O  | 48 | 10.097 | -1.487 | 2.035  |
| O  | 49 | 9.136  | 0.431  | 1.352  |
